# Supplementary material
Source: PubMed Central journal article supplement (PMC3904765)
Supplement: ci400542n_si_001.pdf [file ci400542n_si_001.pdf]

## Supporting Information

### **Dihedral-based segment identification and classification of biopolymers II: Nucleotides**

Gabor Nagy, Chris Oostenbrink\*

University of Natural Resources and Life Sciences, Institute for Molecular Modeling and Simulation

Muthgasse 18, 1190 Vienna, Austria

\*: corresponding author: [chris.oostenbrink@boku.ac.at](mailto:chris.oostenbrink@boku.ac.at)

Keywords: secondary structure, DNA, RNA, classification, bioinformatics, modeling

Table S1: Definitions for DISICL polynucleotide classification. Definitions of the regions in Figure 1 (on the left side) in terms of the ( $\epsilon, \zeta, \chi$ ) dihedral angles of the polynucleotide backbone. Angles are shown in degrees, and rectangles with identical names are merged together to follow the non-rectangular nature of the density distributions. Subregions are corrections for overlaps, and overwrite definitions in their volume.

| <b>DISICL Polynucleotide Regions</b> |                                     |                                     |                                  |                                  |                                 |                                 |
|--------------------------------------|-------------------------------------|-------------------------------------|----------------------------------|----------------------------------|---------------------------------|---------------------------------|
| <b>Region Definitions (0 - 360)</b>  |                                     |                                     |                                  |                                  |                                 |                                 |
| <b>Name</b>                          | <b><math>\epsilon_{\min}</math></b> | <b><math>\epsilon_{\max}</math></b> | <b><math>\zeta_{\min}</math></b> | <b><math>\zeta_{\max}</math></b> | <b><math>\chi_{\min}</math></b> | <b><math>\chi_{\max}</math></b> |
| $\alpha_1$                           | 175                                 | 225                                 | 250                              | 310                              | 170                             | 235                             |
| $\alpha_2$                           | 165                                 | 250                                 | 310                              | 360                              | 160                             | 250                             |
| $\alpha_2$                           | 145                                 | 230                                 | 0                                | 40                               | 180                             | 270                             |
| $\alpha_3$                           | 225                                 | 290                                 | 250                              | 310                              | 150                             | 260                             |
| $\beta_1$                            | 145                                 | 225                                 | 240                              | 305                              | 215                             | 290                             |
| $\beta_2$                            | 225                                 | 310                                 | 120                              | 215                              | 180                             | 310                             |
| $\beta_3$                            | 160                                 | 225                                 | 150                              | 240                              | 215                             | 280                             |
| $\zeta_1$                            | 150                                 | 260                                 | 230                              | 330                              | 20                              | 100                             |
| $\zeta_3$                            | 135                                 | 250                                 | 30                               | 120                              | 20                              | 105                             |
| $\zeta_2$                            | 170                                 | 320                                 | 40                               | 120                              | 160                             | 290                             |
| $\delta_1$                           | 20                                  | 100                                 | 25                               | 135                              | 170                             | 290                             |
| $\delta_2$                           | 20                                  | 120                                 | 155                              | 340                              | 190                             | 290                             |
| $\delta_3$                           | 20                                  | 100                                 | 25                               | 100                              | 30                              | 100                             |
| <b>subregions:</b>                   |                                     |                                     |                                  |                                  |                                 |                                 |
| ab1                                  | 175                                 | 225                                 | 250                              | 305                              | 215                             | 235                             |
| ab2                                  | 225                                 | 300                                 | 215                              | 250                              | 160                             | 280                             |
| $\alpha_1$                           | 225                                 | 250                                 | 250                              | 285                              | 170                             | 215                             |
| $\beta_3$                            | 180                                 | 225                                 | 240                              | 250                              | 215                             | 270                             |

Table S2: Superclass mapping used to calculate the overall agreement between methods (Table 1). Abbreviations for simplified classes are found in Tables 3-4.

| <b>Methods</b>       | <b>DISICL vs. X3DNA</b>                           |
|----------------------|---------------------------------------------------|
| <b>A-Helix match</b> | AH/A                                              |
| <b>B-Helix match</b> | BH/B, IB/B                                        |
| <b>Trans. match</b>  | AB/TA, TR/TA                                      |
| <b>Overall Match</b> | A-hel. match, B-hel. match<br>Trans. Match, UC/UC |

Table S3: Scaled match scores for the comparison of secondary structure classifications by DISICL and X3DNA on the DNA dataset. For both algorithms, the occurrence of each class is displayed. In the top half of the table, simplified DISICL classes are compared to X3DNA classes. In the lower half of the table, detailed DISICL classes are compared to X3DNA classes.

| Class               | X3DNA |  | A helix | B helix | TA trans. | Unclassified |
|---------------------|-------|--|---------|---------|-----------|--------------|
| DISICL              | %     |  | 2.0     | 34.7    | 0.4       | 62.8         |
|                     |       |  |         |         |           |              |
| <b>B-helix</b>      | 35.6  |  | 0.9     | 48.3    | 31.3      | 46.6         |
| <b>Irregular B</b>  | 21.7  |  | 1.5     | 43.3    | 15.1      | 48.7         |
| <b>A-helix</b>      | 2.2   |  | 64.2    | 6.1     | 1.4       | 23.7         |
| <b>Irregular A</b>  | 2.1   |  | 2.8     | 2.9     | 1.1       | 61.8         |
| <b>Z-helix</b>      | 1.0   |  | 0.0     | 0.0     | 0.0       | 68.4         |
| <b>Quad-loop</b>    | 3.6   |  | 0.0     | 4.8     | 0.8       | 83.1         |
| <b>AB trans.</b>    | 8.8   |  | 1.3     | 13.9    | 5.6       | 49.1         |
| <b>Transitory</b>   | 11.1  |  | 4.4     | 34.4    | 12.8      | 56.6         |
| <b>Unclassified</b> | 14.0  |  | 3.3     | 13.5    | 11.2      | 51.3         |

| Class               | X3DNA |  | A helix | B helix | TA trans. | Unclassified |
|---------------------|-------|--|---------|---------|-----------|--------------|
| DISICL              | %     |  | 2.0     | 34.7    | 0.4       | 62.8         |
|                     |       |  |         |         |           |              |
| <b>BI-helix</b>     | 35.6  |  | 0.9     | 48.3    | 31.3      | 46.6         |
| <b>BII-helix</b>    | 3.4   |  | 0.0     | 46.9    | 1.7       | 42.8         |
| <b>BIII-helix</b>   | 2.4   |  | 0.1     | 43.0    | 1.4       | 53.0         |
| <b>B-loop</b>       | 15.9  |  | 1.4     | 42.6    | 12.0      | 49.4         |
| <b>A-helix</b>      | 2.2   |  | 64.2    | 6.1     | 1.4       | 23.7         |
| <b>A-loop</b>       | 0.4   |  | 7.0     | 2.6     | 0.0       | 53.0         |
| <b>Z-helix</b>      | 1.0   |  | 0.0     | 0.0     | 0.0       | 68.4         |
| <b>Quad-loop</b>    | 3.6   |  | 0.0     | 4.8     | 0.8       | 83.1         |
| <b>Sharp-turns</b>  | 3.1   |  | 0.1     | 5.7     | 2.2       | 41.0         |
| <b>Tetraloop B.</b> | 1.6   |  | 1.9     | 2.2     | 1.1       | 63.3         |
| <b>AB trans.</b>    | 11.1  |  | 4.4     | 34.4    | 12.8      | 56.6         |
| <b>AB2 trans.</b>   | 1.4   |  | 0.8     | 14.4    | 1.4       | 55.6         |
| <b>AZ trans.</b>    | 0.3   |  | 0.0     | 5.4     | 0.0       | 61.4         |
| <b>ZB trans.</b>    | 0.9   |  | 0.0     | 8.2     | 0.0       | 71.2         |
| <b>AD trans.</b>    | 0.3   |  | 5.4     | 15.8    | 0.0       | 52.2         |
| <b>BD trans.</b>    | 2.3   |  | 0.2     | 30.5    | 2.0       | 45.0         |
| <b>ZD trans.</b>    | 0.6   |  | 0.0     | 3.4     | 0.0       | 53.6         |
| <b>Unclassified</b> | 14.0  |  | 3.3     | 13.5    | 11.2      | 51.3         |

Table S4: Pearson correlation matrices for the comparison of secondary structure classifications by DISICL and X3DNA algorithms. In the top half of the table, simplified DISICL classes are compared with X3DNA classes in the DNA dataset, while the bottom half of the table shows the same comparison between detailed DISICL classes and X3DNA classes.

| Pearson Score DNA (Simple DISICL/X3DNA) |         |         |        |              |
|-----------------------------------------|---------|---------|--------|--------------|
| DISICL/X3DNA                            | A-helix | B-helix | Trans. | Unclassified |
| B-helix                                 | -0.015  | 0.387   | 0.032  | 0.238        |
| Irreg.B                                 | -0.008  | 0.262   | 0.018  | 0.196        |
| A-helix                                 | 0.589   | -0.004  | 0.005  | 0.017        |
| Irreg.A                                 | 0.021   | -0.011  | 0.004  | 0.083        |
| Z-helix                                 | -0.003  | -0.012  | -0.001 | 0.065        |
| Quad-loop                               | -0.005  | -0.009  | 0.001  | 0.156        |
| Transitory                              | -0.001  | 0.028   | 0.01   | 0.124        |
| AB trans.                               | 0.012   | 0.139   | 0.025  | 0.171        |
| Unclassified                            | 0.004   | 0.033   | 0.018  | 0.168        |

| Pearson Score DNA (detailed DISICL/X3DNA) |         |         |        |              |
|-------------------------------------------|---------|---------|--------|--------------|
| DISICL/X3DNA                              | A-helix | B-helix | Trans. | Unclassified |
| BI-helix                                  | -0.015  | 0.387   | 0.032  | 0.238        |
| BII-helix                                 | -0.005  | 0.112   | 0.004  | 0.063        |
| BIII-helix                                | -0.003  | 0.085   | 0.005  | 0.072        |
| B-loop                                    | -0.006  | 0.218   | 0.018  | 0.17         |
| A-helix                                   | 0.589   | -0.004  | 0.005  | 0.017        |
| A-loop                                    | 0.026   | -0.005  | -0.001 | 0.03         |
| Z-helix                                   | -0.003  | -0.012  | -0.001 | 0.065        |
| Quad-loop                                 | -0.005  | -0.009  | 0.001  | 0.156        |
| Sharp-turns                               | -0.004  | -0.006  | 0.007  | 0.056        |
| Tetraloop B.                              | 0.011   | -0.011  | 0.005  | 0.074        |
| AB trans.                                 | 0.012   | 0.139   | 0.025  | 0.171        |
| AB2 trans.                                | 0.002   | 0.012   | 0.007  | 0.058        |
| AZ trans.                                 | -0.002  | -0.002  | -0.001 | 0.03         |
| ZB trans.                                 | -0.003  | 0       | -0.001 | 0.066        |
| AD trans.                                 | 0.016   | 0.007   | -0.001 | 0.024        |
| BD trans.                                 | -0.002  | 0.053   | 0.008  | 0.056        |
| ZD trans.                                 | -0.002  | -0.005  | -0.001 | 0.035        |
| Unclassified                              | 0.004   | 0.033   | 0.018  | 0.168        |

Table S5: Scaled match scores for the comparison of secondary structure classifications by DISICL and X3DNA on the RNA dataset. For both algorithms, the occurrence of each class is displayed. In the top half of the table, simplified DISICL classes are compared to X3DNA classes. In the lower half of the table, detailed DISICL classes are compared to X3DNA classes.

| Class               | X3DNA |  | A helix | B helix | TA trans. | Unclassified |
|---------------------|-------|--|---------|---------|-----------|--------------|
| DISICL              | %     |  | 56.7    | 0.02    | 1.2       | 42.1         |
|                     |       |  |         |         |           |              |
| <b>B-helix</b>      | 0.4   |  | 2.3     | 0.0     | 10.2      | 42.4         |
| <b>Irregular B</b>  | 1.0   |  | 10.6    | 5.9     | 0.4       | 42.2         |
| <b>A-helix</b>      | 51.3  |  | 66.3    | 11.8    | 25.7      | 36.2         |
| <b>Irregular A</b>  | 16.0  |  | 30.9    | 11.8    | 8.6       | 43.2         |
| <b>Z-helix</b>      | 0.4   |  | 1.5     | 0.0     | 0.0       | 22.0         |
| <b>Quad-loop</b>    | 0.4   |  | 7.8     | 2.9     | 0.0       | 40.0         |
| <b>AB trans.</b>    | 8.0   |  | 15.7    | 23.5    | 1.0       | 42.4         |
| <b>Transitory</b>   | 6.6   |  | 33.2    | 11.8    | 37.7      | 44.0         |
| <b>Unclassified</b> | 16.0  |  | 15.6    | 11.8    | 9.5       | 39.7         |

| Class               | X3DNA |  | A helix | B helix | TA trans. | Unclassified |
|---------------------|-------|--|---------|---------|-----------|--------------|
| DISICL              | %     |  | 56.7    | 0.02    | 1.2       | 42.1         |
|                     |       |  |         |         |           |              |
| <b>BI-helix</b>     | 0.4   |  | 2.3     | 0.0     | 10.2      | 42.4         |
| <b>BII-helix</b>    | 0.1   |  | 3.0     | 0.0     | 0.0       | 29.4         |
| <b>BIII-helix</b>   | 0.1   |  | 0.0     | 0.0     | 0.0       | 30.4         |
| <b>B-loop</b>       | 0.8   |  | 12.6    | 5.9     | 0.5       | 45.0         |
| <b>A-helix</b>      | 51.3  |  | 66.3    | 11.8    | 25.7      | 36.2         |
| <b>A-loop</b>       | 7.1   |  | 38.8    | 2.9     | 5.1       | 41.6         |
| <b>Z-helix</b>      | 0.4   |  | 1.5     | 0.0     | 0.0       | 22.0         |
| <b>Quad-loop</b>    | 0.4   |  | 7.8     | 2.9     | 0.0       | 40.0         |
| <b>Sharp-turns</b>  | 2.1   |  | 7.5     | 5.9     | 0.2       | 32.4         |
| <b>Tetraloop B.</b> | 8.6   |  | 25.0    | 8.8     | 3.4       | 44.8         |
| <b>AB trans.</b>    | 6.6   |  | 33.2    | 11.8    | 37.7      | 44.0         |
| <b>AB2 trans.</b>   | 3.2   |  | 19.8    | 11.8    | 0.5       | 43.5         |
| <b>AZ trans.</b>    | 1.0   |  | 4.9     | 0.0     | 0.1       | 65.3         |
| <b>ZB trans.</b>    | 0.4   |  | 8.3     | 0.0     | 0.4       | 31.3         |
| <b>AD trans.</b>    | 1.0   |  | 38.2    | 0.0     | 0.1       | 39.4         |
| <b>BD trans.</b>    | 0.4   |  | 4.8     | 5.9     | 0.5       | 46.7         |
| <b>ZD trans.</b>    | 0.2   |  | 9.4     | 0.0     | 0.0       | 36.1         |
| <b>Unclassified</b> | 16.0  |  | 15.6    | 11.8    | 9.5       | 39.7         |

Table S6: Pearson correlation matrices for the comparison of secondary structure classifications by DISICL and X3DNA algorithms. In the top half of the table simplified DISICL classes are compared with X3DNA classes in the RNA dataset, while the bottom half of the table shows the same comparison between detailed DISICL classes and X3DNA classes.

| Pearson Score RNA (Simple DISICL/X3DNA) |         |         |        |              |
|-----------------------------------------|---------|---------|--------|--------------|
| DISICL/X3DNA                            | A-helix | B-helix | Trans. | Unclassified |
| B-helix                                 | -0.012  | 0       | 0.057  | 0.032        |
| Irreg.B                                 | -0.007  | 0.008   | 0.001  | 0.052        |
| A-helix                                 | 0.593   | -0.001  | 0.017  | 0.212        |
| Irreg.A                                 | 0.095   | 0.003   | 0.01   | 0.221        |
| Z-helix                                 | -0.014  | 0       | -0.002 | 0.012        |
| Quad-loop                               | -0.007  | 0.007   | -0.002 | 0.029        |
| Transitory                              | 0.001   | 0.011   | -0.005 | 0.151        |
| AB trans.                               | 0.069   | 0.006   | 0.149  | 0.144        |
| Unclassified                            | 0.001   | 0.003   | 0.013  | 0.197        |

| Pearson Score RNA (detailed DISICL/X3DNA) |         |         |        |              |
|-------------------------------------------|---------|---------|--------|--------------|
| DISICL/X3DNA                              | A-helix | B-helix | Trans. | Unclassified |
| BI-helix                                  | -0.012  | 0       | 0.057  | 0.032        |
| BII-helix                                 | -0.007  | 0       | -0.001 | 0.011        |
| BIII-helix                                | -0.006  | 0       | -0.001 | 0.008        |
| B-loop                                    | -0.004  | 0.009   | 0.002  | 0.051        |
| A-helix                                   | 0.593   | -0.001  | 0.017  | 0.212        |
| A-loop                                    | 0.094   | 0       | 0.012  | 0.138        |
| Z-helix                                   | -0.014  | 0       | -0.002 | 0.012        |
| Quad-loop                                 | -0.007  | 0.007   | -0.002 | 0.029        |
| Sharp-turns                               | -0.017  | 0.005   | -0.003 | 0.052        |
| Tetraloop B.                              | 0.043   | 0.003   | 0.003  | 0.169        |
| AB trans.                                 | 0.069   | 0.006   | 0.149  | 0.144        |
| AB2 trans.                                | 0.012   | 0.009   | -0.003 | 0.098        |
| AZ trans.                                 | -0.016  | 0       | -0.002 | 0.09         |
| ZB trans.                                 | -0.007  | 0       | 0.001  | 0.022        |
| AD trans.                                 | 0.034   | 0       | -0.002 | 0.047        |
| BD trans.                                 | -0.01   | 0.014   | 0.001  | 0.036        |
| ZD trans.                                 | -0.004  | 0       | -0.001 | 0.017        |
| Unclassified                              | 0.001   | 0.003   | 0.013  | 0.197        |
